# Supplementary material for: Conjugate eye movements guide jumping locomotion in an avian species
Source: Oxford University Press journal article supplement (doi:10.1242/jeb.211565), 2019-10-15
Supplement: jeb211565supp.pdf [file jeb211565supp.pdf]

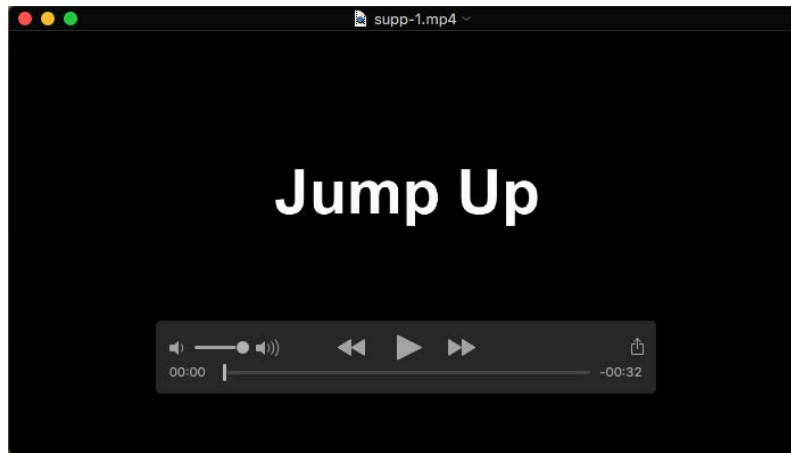

**Movie 1. An example of how peahens direct their attention when they jump up and down a perch.** The upper left video displays the field of view of the left eye as well as an insert of the left eye. The upper right video displays the field of view of the right eye as well as an insert of the right eye. The magenta dots indicate where the peahens are gazing within each field of view and the circle surrounding them indicates a 10° radius around the point of gaze. The lower left video displays multiple views of the experimental room.

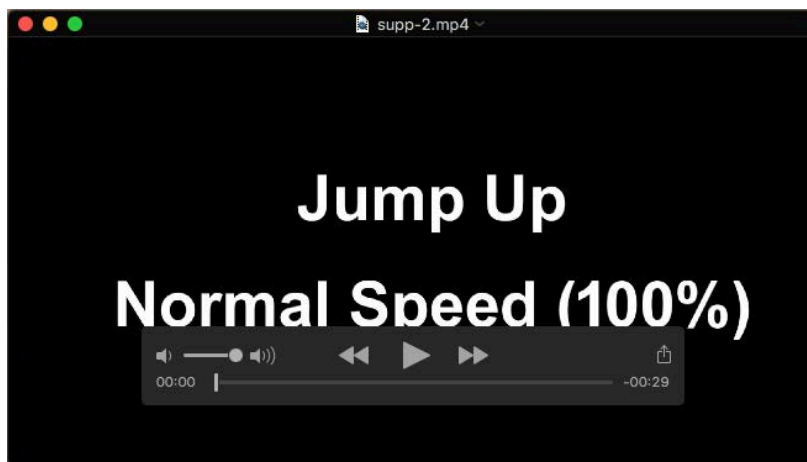

**Movie 2. A peahen's head and body are roughly aligned when jumping on the perch.**

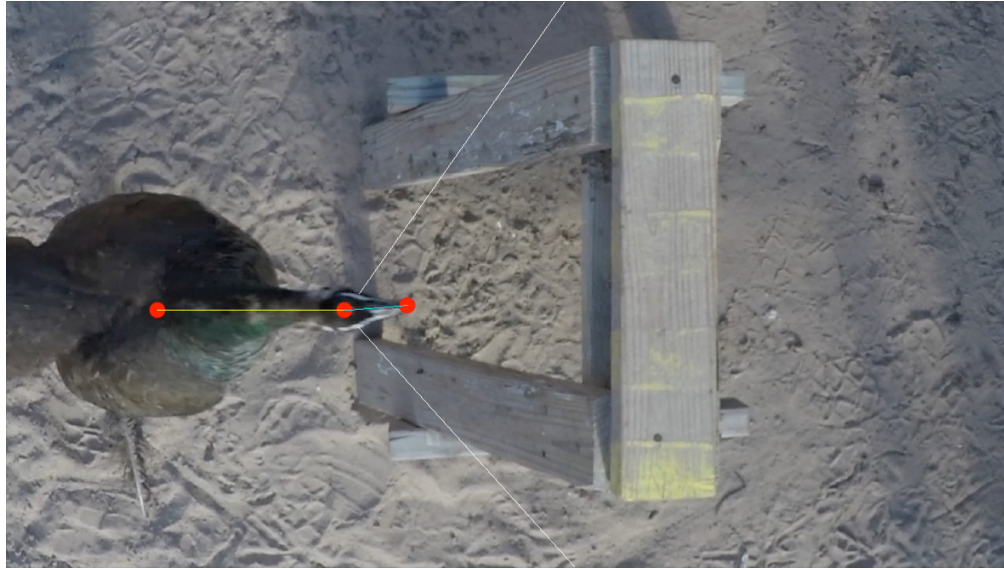

**Figure S1.** An example frame showing that the peahen's head and body are roughly aligned when jumping up the perch. The red dots mark the middle of the body, middle of the head, and the beak tip. The angle between the head position (turquoise line) and body position (yellow line) is approximately 3 degrees. Assuming the area centralis projects approximately 55 degrees to the left and right of the sagittal plane, the white lines indicate the approximate gaze projections.
